# Supplementary material for: Population structure and transmission of Mycobacterium bovis in Ethiopia
Source: PubMed Central journal article supplement (PMC8209724; doi:10.1099/mgen.0.000539), 2021-05-04
Supplement: mgen-7-0539-s001.pdf [file mgen-7-0539-s001.pdf]

Supplementary Table 1: Model performance based on marginal likelihood estimates (MLE) Bayes factors.

| <b>Model</b>        | <b>log MLE</b> | <b>log Bayes Factor</b> | <b>Strength of Evidence (Kass &amp; Raftery, 1995)</b> |
|---------------------|----------------|-------------------------|--------------------------------------------------------|
| Relaxed constant    | -5604954.493   | -                       | -                                                      |
| Relaxed exponential | -5604956.354   | 1.861248229             | Positive                                               |
| Strict exponential  | -5605103.905   | 149.4115816             | Very strong                                            |
| Strict constant     | -5605106.444   | 151.9514509             | Very strong                                            |

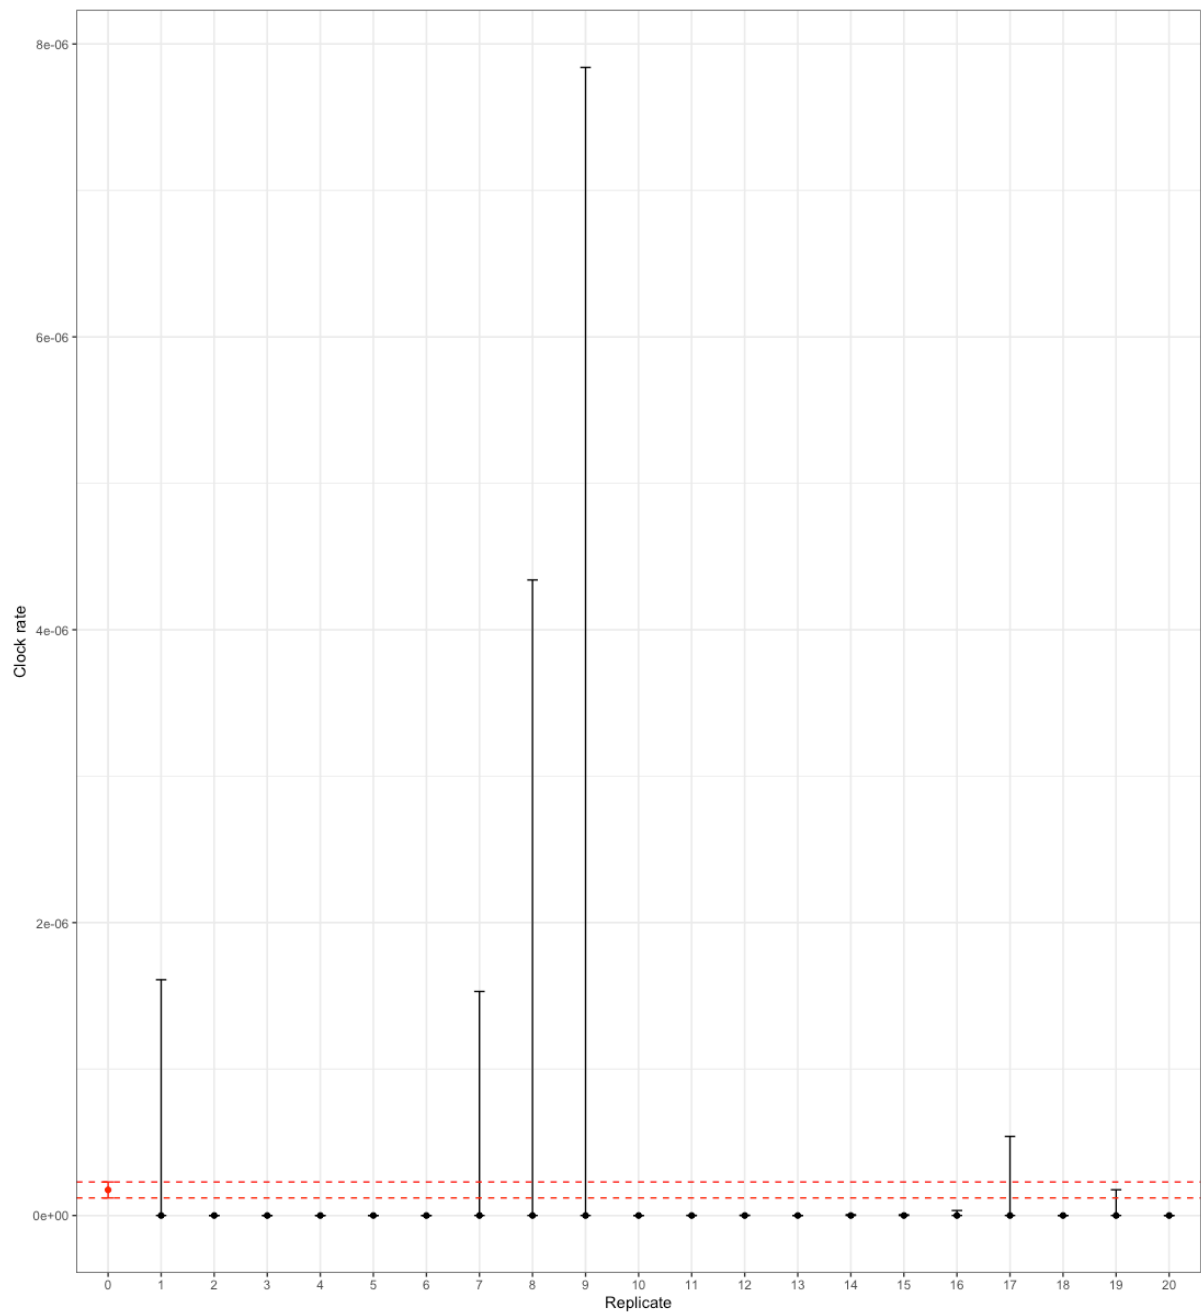

Supplementary Figure 1: BEAST dated tip randomization (DTR) analysis. Observed data is highlighted in red.
